# Supplementary material
Source: MDPI journal article supplement (https://www.mdpi.com/2073-4395/5/2/107)
Supplement: s1 [file s1]

## Supplementary

**Table S1.** Coefficient of variation (CV %) for leaf traits at different developmental stages and sub-phases in two- and six-rowed barley.

| Developmental Stages/Subphase * | Coefficients Of Variation (CV %) |                  |        |      |                  |        |
|---------------------------------|----------------------------------|------------------|--------|------|------------------|--------|
|                                 | (GH)                             | Two-Rowed (Pots) | (Soil) | (GH) | Six-Rowed (Pots) | (Soil) |
| ‡ LA- AP                        | 27                               | 17               | 16     | 28   | 16               | 22     |
| LA-TIP                          | 73                               | 24               | 31     | 32   | 24               | 28     |
| LA-HD                           | 80                               | 14               | 28     | 41   | 24               | 31     |
| LA-AE                           | 74                               | 18               | 35     | 27   | 21               | 23     |
| LDW-AP                          | 25                               | 29               | 18     | 20   | 29               | 26     |
| LDW-TIP                         | 40                               | 24               | 24     | 26   | 26               | 25     |
| LDW-HD                          | 46                               | 20               | 27     | 33   | 27               | 23     |
| LDW-AE                          | 57                               | 28               | 22     | 40   | 23               | 17     |
| LMA- AP                         | 73                               | 68               | 55     | 73   | 70               | 60     |
| LMA-TIP                         | 65                               | 49               | 39     | 61   | 53               | 50     |
| LMA-HD                          | 79                               | 70               | 47     | 58   | 57               | 62     |
| LMA-AE                          | 84                               | 78               | 33     | 76   | 57               | 72     |
| LFWGR-AP                        | 20                               | 27               | 16     | 21   | 25               | 24     |
| LFWGR-TIP                       | 33                               | 22               | 25     | 32   | 23               | 25     |
| LFWGR-HD                        | 27                               | 22               | 26     | 37   | 28               | 24     |
| LFWGR-AE                        | 33                               | 29               | 29     | 33   | 24               | 24     |
| LFWGR (AP-TIP)                  | 74                               | 50               | 48     | 64   | 58               | 43     |
| LFWGR (AP-HD)                   | 76                               | 67               | 46     | 56   | 49               | 53     |
| LDWGR-AP                        | 28                               | 22               | 19     | 32   | 16               | 25     |
| LDWGR-TIP                       | 34                               | 20               | 24     | 30   | 22               | 24     |
| LDWGR-HD                        | 32                               | 27               | 19     | 37   | 26               | 31     |
| LDWGR-AE                        | 37                               | 30               | 22     | 38   | 23               | 30     |
| LDWGR (AP-TIP)                  | 75                               | 31               | 37     | 51   | 43               | 31     |
| LDWGR (AP-HD)                   | 53                               | 42               | 30     | 50   | 33               | 40     |
| LAGR-AP                         | 30                               | 16               | 14     | 22   | 16               | 19     |
| LAGR-TIP                        | 29                               | 21               | 26     | 29   | 26               | 26     |
| LAGR-HD                         | 29                               | 24               | 23     | 22   | 30               | 34     |
| LAGR-AE                         | 29                               | 22               | 25     | 28   | 20               | 27     |
| LAGR (AP-TIP)                   | 83                               | 44               | 51     | 53   | 61               | 43     |
| LAGR (AP-HD)                    | 67                               | 44               | 41     | 39   | 61               | 48     |

\* AP: awn primordium, Alqudah and Schnurbusch [30]; TIP: tipping, Z49; HD: heading, Z55; AE: anther extrusion, Z65, Zadoks, Chang and Konzak [34]; ‡ LA: leaf area; LDW: Leaf dry weight; LMA: Leaf mass area; LFWGR: Leaf fresh weight growth rate; LDWGR: Leaf dry weight growth rate; LAGR: Leaf area growth rate; GH: greenhouse.

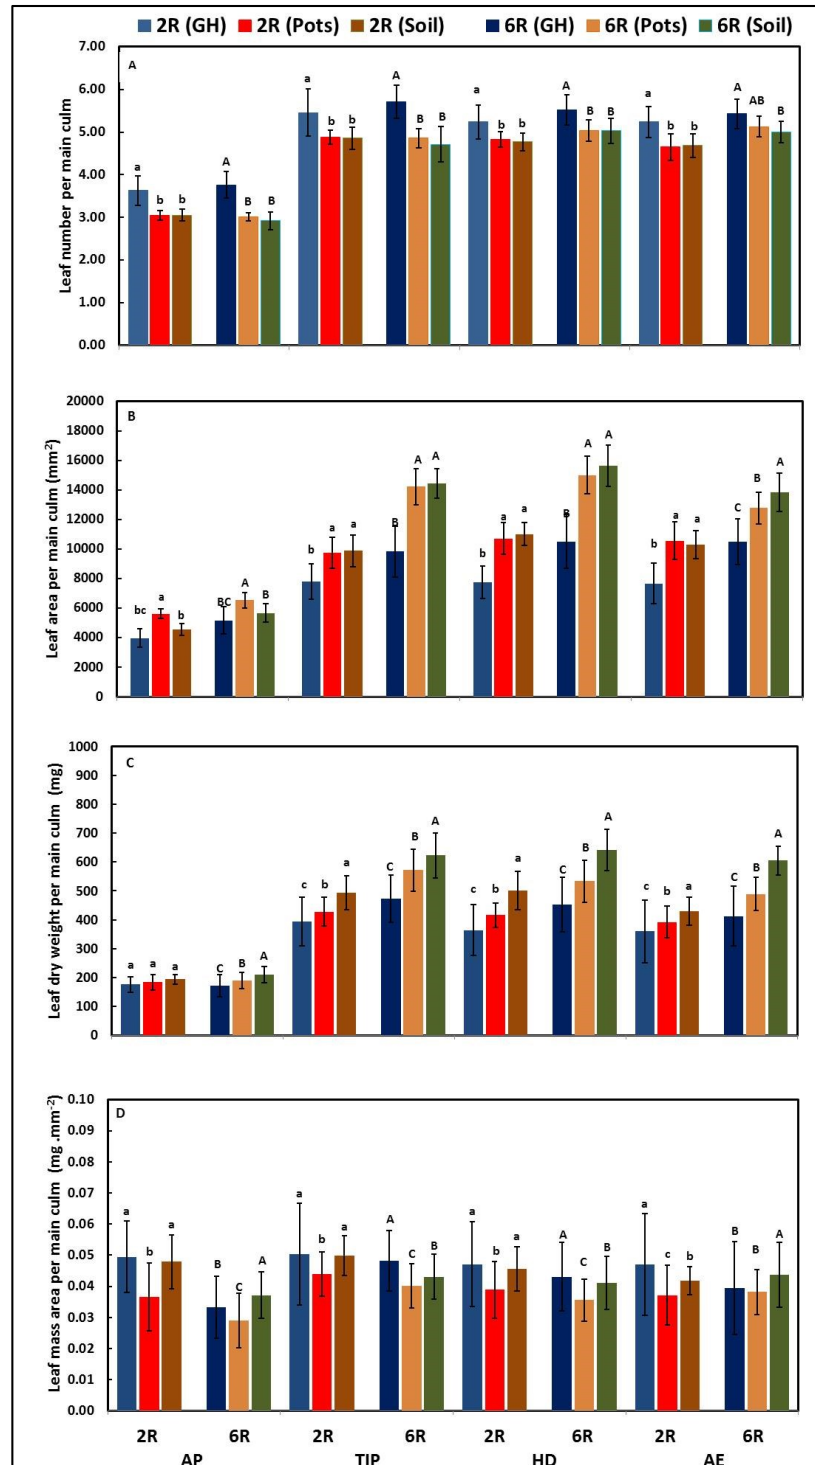

**Figure S1.** Leaf traits per main culm at different stages for two- and six-rowed barley at different growth conditions. (A) Leaf number; (B) leaf area; (C) leaf dry weight; and (D) leaf mass area. Small and capital letters differentiate two-rowed and six-rowed barley, respectively. Same letters for each row-type are not significantly different at  $p \leq 0.05$  according to Least Significant Difference. Bars indicate standard deviation ( $n = 14$  and  $18$  for two- and six-rowed barley in each growth condition, respectively). AP: awn primordium, Alqudah and Schnurbusch [30]; TIP: tipping, Z49; HD: heading, Z55; AE: anther extrusion, Z65, Zadoks, Chang and Konzak [34]. GH: greenhouse; 2R: two-rowed and 6R: six-rowed.

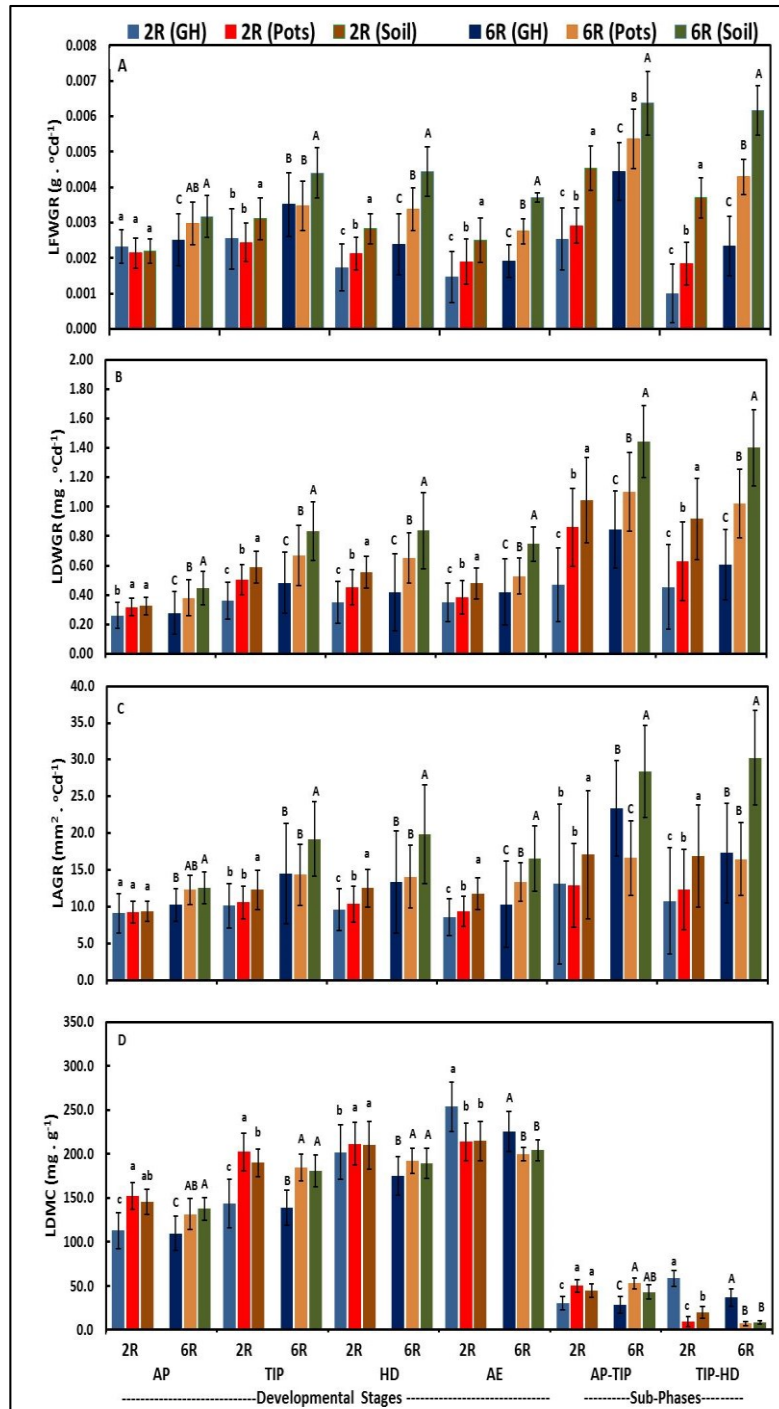

**Figure S2.** Leaf growth rate per main culm at different stages for two- and six-rowed barley at different growth conditions. **(A)** Leaf fresh weight growth rate (LFWGR); **(B)** leaf dry weight growth rate (LDWGR); **(C)** leaf area growth rate (LAGR); and **(D)** leaf dry matter content (LDMC). Small and capital letters differentiate two-rowed and six-rowed barley, respectively. Same letters for each row-type are not significantly different at  $p \leq 0.05$  according to Least Significant Difference. Bars indicate standard deviation ( $n = 14$  and  $18$  for two- and six-rowed barley in each growth condition, respectively). AP: awn primordium, Alqudah and Schnurbusch [30]; TIP: tipping, Z49; HD: heading, Z55; AE: anther extrusion, Z65, Zadoks, Chang and Konzak [34]. GH: greenhouse; 2R: two-rowed and 6R: six-rowed.
