# Supplementary material
Source: MDPI journal article supplement (https://www.mdpi.com/2073-4395/5/2/107)
Supplement: s2 [file s2]

Supplementary

**Table S1.** Coefficient of variation (CV %) for leaf traits at different developmental stages and sub-phases in two- and six-rowed barley.

| **Developmental Stages/Subphase** * | **Coefficients Of Variation (CV %)** | | | | | |
| --- | --- | --- | --- | --- | --- | --- |
| **(GH)** | **Two-Rowed (Pots)** | **(Soil)** | **(GH)** | **Six-Rowed (Pots)** | **(Soil)** |
| **‡ LA- AP** | 27 | 17 | 16 | 28 | 16 | 22 |
| **LA-TIP** | 73 | 24 | 31 | 32 | 24 | 28 |
| **LA-HD** | 80 | 14 | 28 | 41 | 24 | 31 |
| **LA-AE** | 74 | 18 | 35 | 27 | 21 | 23 |
| **LDW-AP** | 25 | 29 | 18 | 20 | 29 | 26 |
| **LDW-TIP** | 40 | 24 | 24 | 26 | 26 | 25 |
| **LDW-HD** | 46 | 20 | 27 | 33 | 27 | 23 |
| **LDW-AE** | 57 | 28 | 22 | 40 | 23 | 17 |
| **LMA- AP** | 73 | 68 | 55 | 73 | 70 | 60 |
| **LMA-TIP** | 65 | 49 | 39 | 61 | 53 | 50 |
| **LMA-HD** | 79 | 70 | 47 | 58 | 57 | 62 |
| **LMA-AE** | 84 | 78 | 33 | 76 | 57 | 72 |
| **LFWGR-AP** | 20 | 27 | 16 | 21 | 25 | 24 |
| **LFWGR-TIP** | 33 | 22 | 25 | 32 | 23 | 25 |
| **LFWGR-HD** | 27 | 22 | 26 | 37 | 28 | 24 |
| **LFWGR-AE** | 33 | 29 | 29 | 33 | 24 | 24 |
| **LFWGR (AP-TIP)** | 74 | 50 | 48 | 64 | 58 | 43 |
| **LFWGR (AP-HD)** | 76 | 67 | 46 | 56 | 49 | 53 |
| **LDWGR-AP** | 28 | 22 | 19 | 32 | 16 | 25 |
| **LDWGR-TIP** | 34 | 20 | 24 | 30 | 22 | 24 |
| **LDWGR-HD** | 32 | 27 | 19 | 37 | 26 | 31 |
| **LDWGR-AE** | 37 | 30 | 22 | 38 | 23 | 30 |
| **LDWGR (AP-TIP)** | 75 | 31 | 37 | 51 | 43 | 31 |
| **LDWGR (AP-HD)** | 53 | 42 | 30 | 50 | 33 | 40 |
| **LAGR-AP** | 30 | 16 | 14 | 22 | 16 | 19 |
| **LAGR-TIP** | 29 | 21 | 26 | 29 | 26 | 26 |
| **LAGR-HD** | 29 | 24 | 23 | 22 | 30 | 34 |
| **LAGR-AE** | 29 | 22 | 25 | 28 | 20 | 27 |
| **LAGR (AP-TIP)** | 83 | 44 | 51 | 53 | 61 | 43 |
| **LAGR (AP-HD)** | 67 | 44 | 41 | 39 | 61 | 48 |

* AP: awn primordium, [Alqudah and Schnurbusch [30]](#_ENREF_30); TIP: tipping, Z49; HD: heading, Z55; AE: anther extrusion, Z65, [Zadoks, Chang and Konzak [34]](#_ENREF_34); **‡** LA: leaf area; LDW: Leaf dry weight; LMA: Leaf mass area; LFWGR: Leaf fresh weight growth rate; LDWGR: Leaf dry weight growth rate; LAGR: Leaf area growth rate; GH: greenhouse.


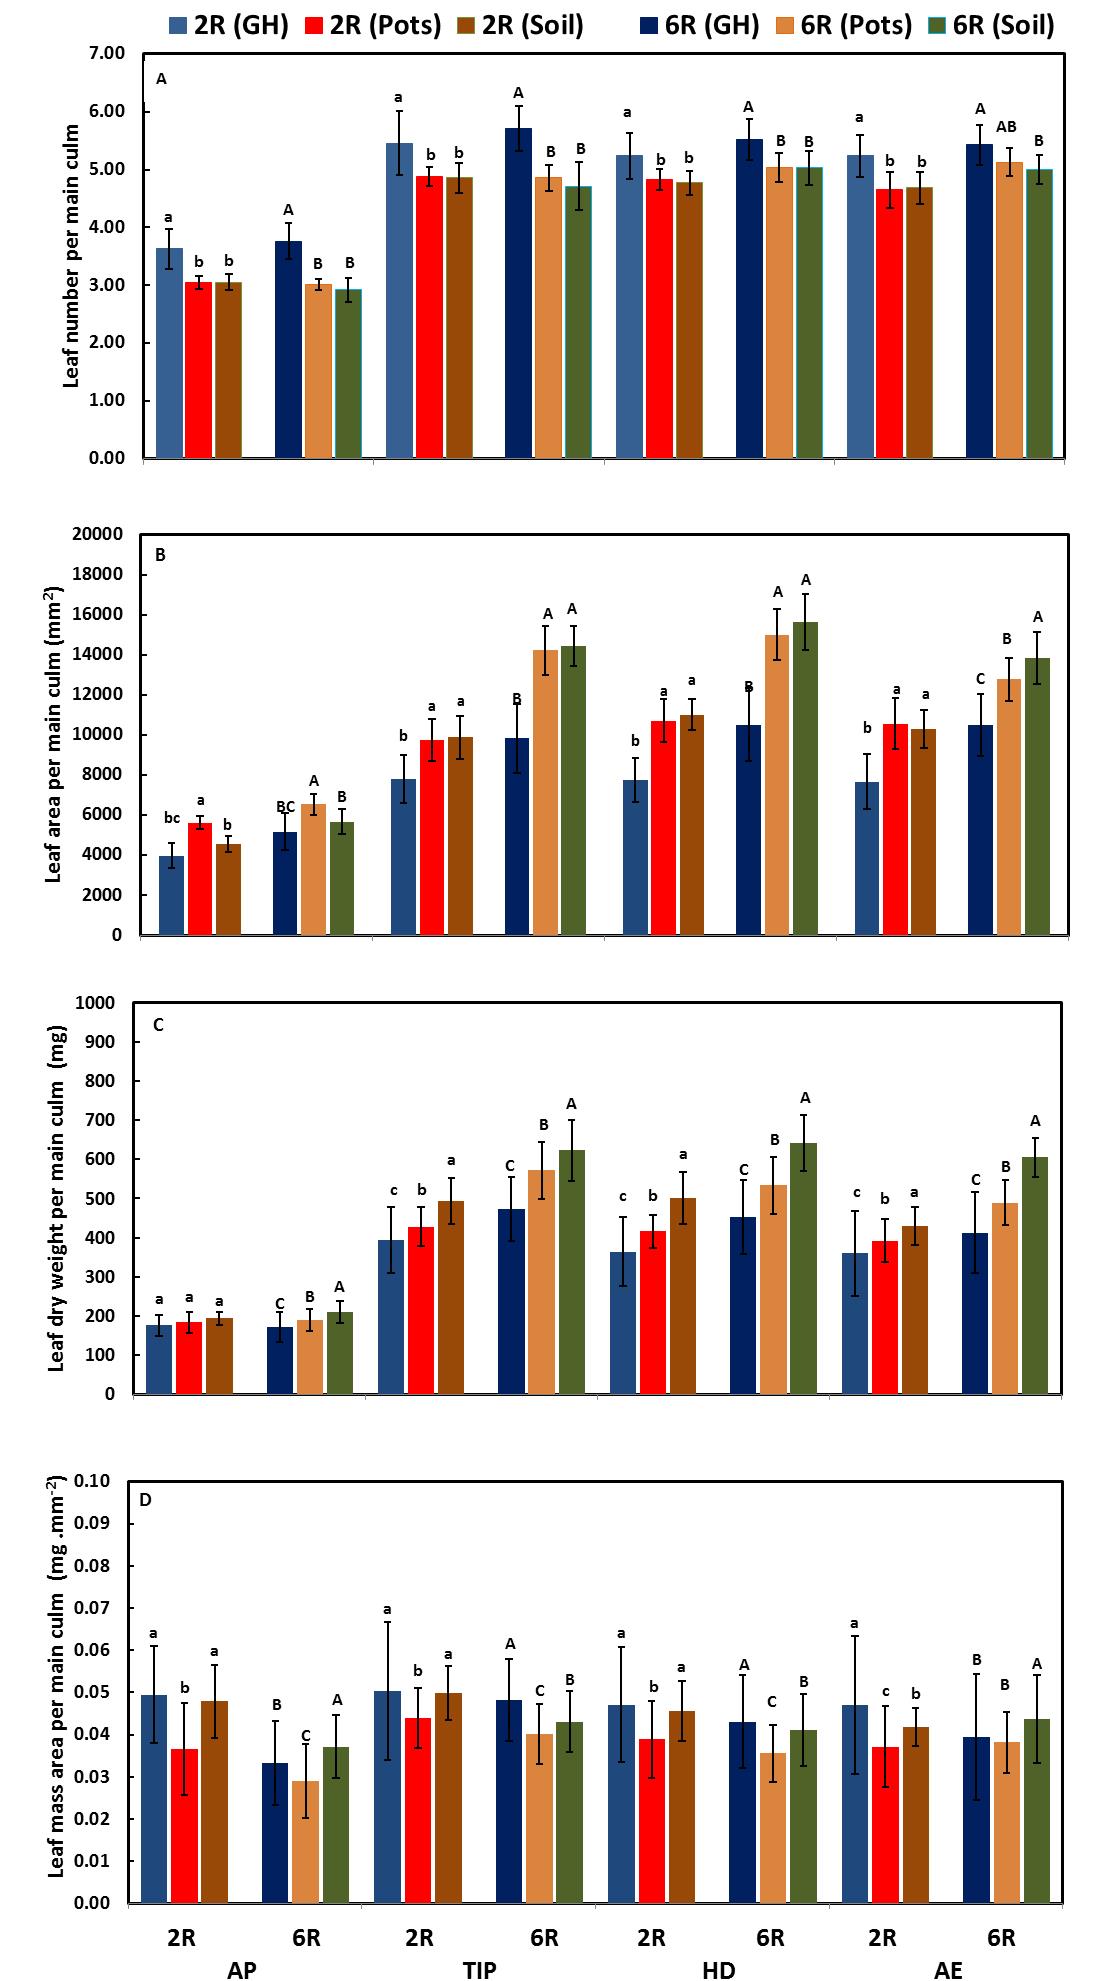


**Figure S1.** Leaf traits per main culm at different stages for two- and six-rowed barley at different growth conditions. (**A**) Leaf number; (**B**) leaf area; (**C**) leaf dry weight; and
(**D**) leaf mass area. Small and capital letters differentiate two-rowed and six-rowed barley, respectively. Same letters for each row-type are not significantly different at *p* ≤ 0.05 according to Least Significant Difference. Bars indicate standard deviation (*n* = 14 and
18 for two- and six-rowed barley in each growth condition, respectively). AP: awn primordium, [Alqudah and Schnurbusch [30]](#_ENREF_30); TIP: tipping, Z49; HD: heading, Z55;
AE: anther extrusion, Z65, [Zadoks, Chang and Konzak [34]](#_ENREF_34). GH: greenhouse;
2R: two-rowed and 6R: six-rowed.


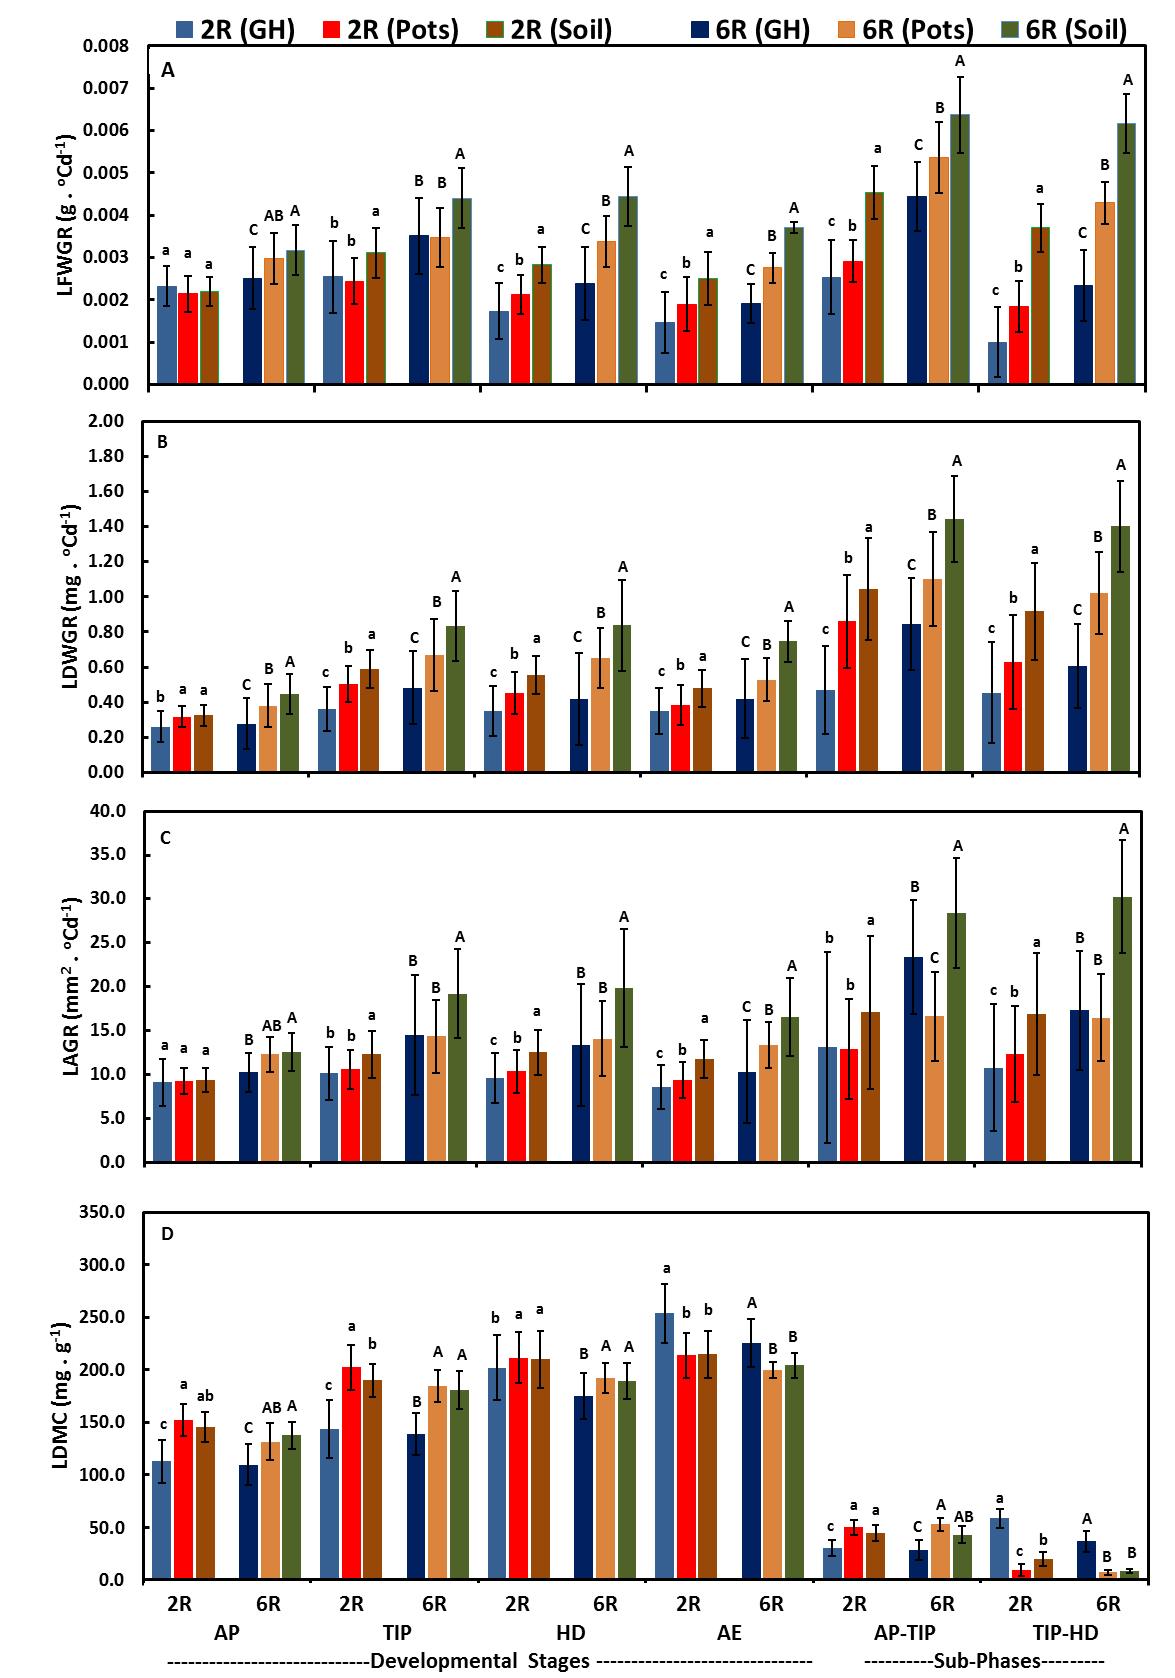


**Figure S2.** Leaf growth rate per main culm at different stages for two- and six-rowed barley at different growth conditions. (**A**) Leaf fresh weight growth rate (LFWGR); (**B**) leaf dry weight growth rate (LDWGR); (**C**) leaf area growth rate (LAGR); and (**D**) leaf dry matter content (LDMC). Small and capital letters differentiate two-rowed and six-rowed barley, respectively. Same letters for each row-type are not significantly different at *p* ≤ 0.05 according to Least Significant Difference. Bars indicate standard deviation (*n* = 14 and
18 for two- and six-rowed barley in each growth condition, respectively). AP: awn primordium, [Alqudah and Schnurbusch [30]](#_ENREF_30); TIP: tipping, Z49; HD: heading, Z55;
AE: anther extrusion, Z65, [Zadoks, Chang and Konzak [34]](#_ENREF_34). GH: greenhouse; 2R:
two-rowed and 6R: six-rowed.
